# Supplementary material for: Total Ortholog Median Matrix as an alternative unsupervised approach for phylogenomics based on evolutionary distance between protein coding genes
Source: PubMed Central journal article supplement (PMC7884790; doi:10.1038/s41598-021-81926-w), 2021-02-15
Supplement: 41598_2021_81926_MOESM2_ESM.pdf [file 41598_2021_81926_MOESM2_ESM.pdf]

```

library(pvclust)
library(snow)
library(ape)
# change to your working directory below
setwd("c:/rsd")
rm(fit)
rm(x)
# Change INPUT1 found several times below for the name of the
matrix table to be analysed
data <- read.delim("table-
INPUT1.tbl", sep="\t", header=TRUE, dec=".", stringsAsFactors =
FALSE, strip.white = TRUE)
x <- as.matrix(data)
fit <- pvclust(x,
method.hclust="average", parallel=TRUE, nboot=10000)
plot(fit, main="PVCLUST with AU values - ortholog percentile =
INPUT1 %", col.pv=c(2,0,0), cex.pv=0.6, float=0.015)
pvrect(fit, alpha=0.95, pv="au", type="geq", max.only=FALSE)
#saves plot generated by pvclust in wmf format
savePlot(filename="INPUT1-pvclust", type=c("wmf"),
device=dev.cur())

#below saves clusters of species found
sink(file="clusters-INPUT1.txt")
pvpick(fit, alpha=0.95, pv="au", type="geq", max.only=FALSE)
sink()

#the function below saves the a.u. values to the newick file
as.phylo.hclust.with.nodenames <- function (x, nodenames, ...)
#We add a nodenames argument
{
  N <- dim(x$merge)[1]
  edge <- matrix(0L, 2 * N, 2)
  edge.length <- numeric(2 * N)
  node <- integer(N)
  node[N] <- N + 2L
  cur.nod <- N + 3L
  j <- 1L
  for (i in N:1) {
    edge[j:(j + 1), 1] <- node[i]
    for (l in 1:2) {
      k <- j + 1 - 1L
      y <- x$merge[i, l]

      if (y > 0) {
        edge[k, 2] <- node[y] <- cur.nod
        cur.nod <- cur.nod + 1L
      }
    }
  }
}

```

```

        edge.length[k] <- x$height[i] - x$height[y]
    }
    else {
        edge[k, 2] <- -y
        edge.length[k] <- x$height[i]
    }
}
j <- j + 2L
}
if (is.null(x$labels))
    x$labels <- as.character(1:(N + 1))
node.lab <- nodenames[order(node)] #Here we define our node
labels
obj <- list(edge = edge, edge.length = edge.length/2,
tip.label = x$labels,
    Nnode = N, node.label = node.lab) #And you put them in
the final object
class(obj) <- "phylo"
reorder(obj)
}

yy<-as.phylo(fit$hclust)
plot(yy)
bootstraps <- (round(fit$edges,2)*100)[,1:2]
yy<-as.phylo.hclust.with.nodenames(fit$hclust,
nodenames=bootstraps[,1])
#modified above to show au instead of bootstrap

sink(file="INPUT1-newick.newick")
# write newick file
write.tree(yy,tree.names=TRUE,digits=2)
sink()
plot(yy,show.node.label=TRUE,cex=0.5) #To show that the order is
correct
#saves plot with au values
savePlot(filename="INPUT1-plot",type=c("wmf"), device=dev.cur())

```
